# Supplementary material for: Scalable decoration of Au nanoparticles on Al nanoconcavity arrays for highly enhanced SERS detection
Source: Royal Society of Chemistry journal article supplement (doi:10.1039/d4tc03243h), 2024-01-01
Supplement: d4tc03243h1.pdf [file d4tc03243h1.pdf]

## Supplementary information

### Scalable Decoration of Au Nanoparticles onto Al nanoconcavities Arrays for Highly Enhanced SERS Detection

Gohar Ijaz Dar, Elisabet Xifre-Perez, and Lluís F. Marsal\*

Departament d'Enginyeria Electrònica, Elèctrica i Automàtica, Universitat Rovira i Virgili,  
Avinguda Països Catalans 26, 43007 Tarragona, Spain,

Email: [lluis.marsal@urv.cat](mailto:lluis.marsal@urv.cat)

#### 1. Characterization of the Au nanoparticles onto Al nanoconcavities substrates

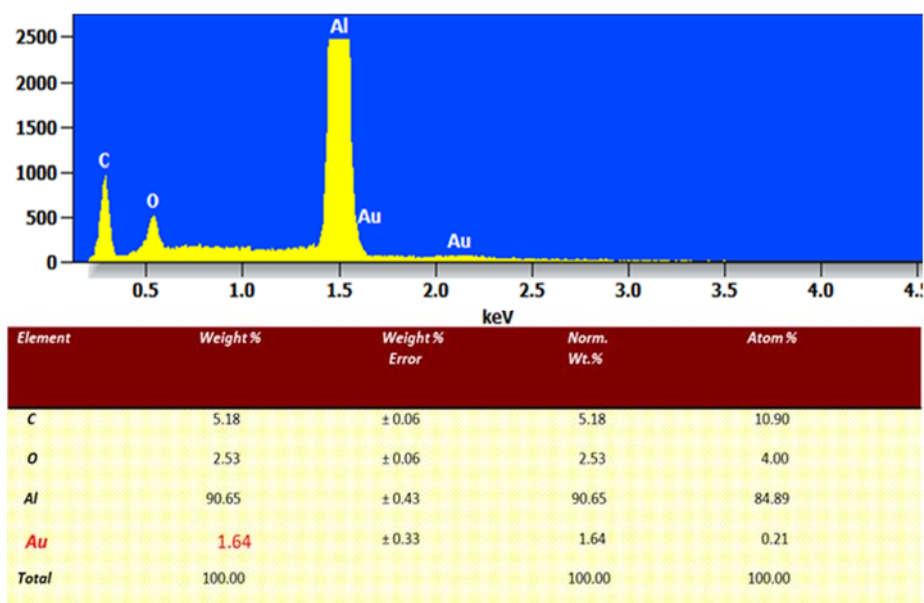

**Figure S1.** EDS Spectrum and quantitative analysis of the concave-like structured Al templates with Au sputtering for 20 s and subsequent thermal annealing 400 °C for 30 min.

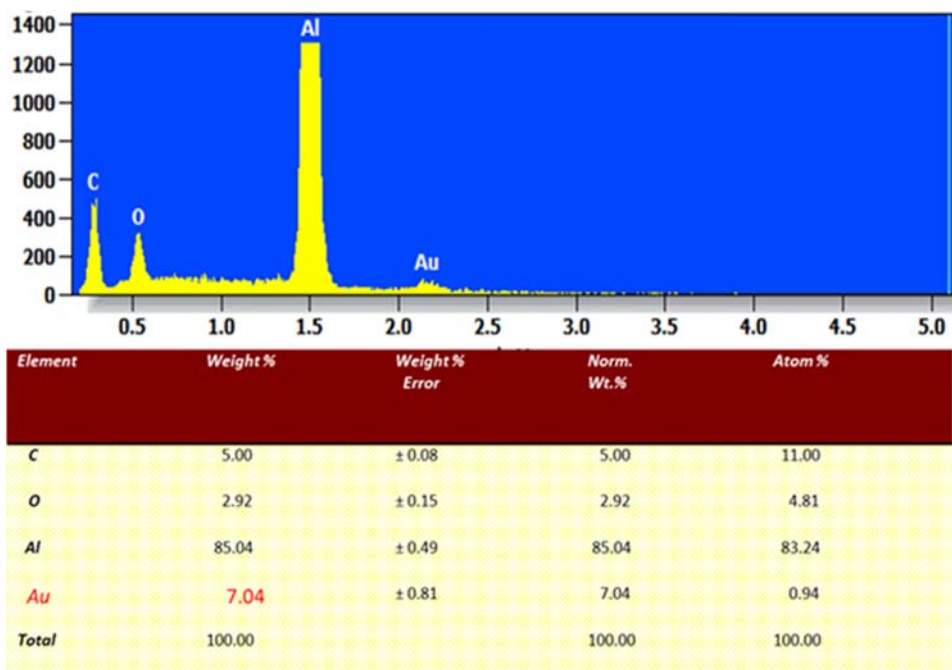

**Figure S2.** EDS Spectrum and quantitative analysis of the concave-like structured Al templates with Au sputtering for 60 s and subsequent thermal annealing 400 °C for 30 min.

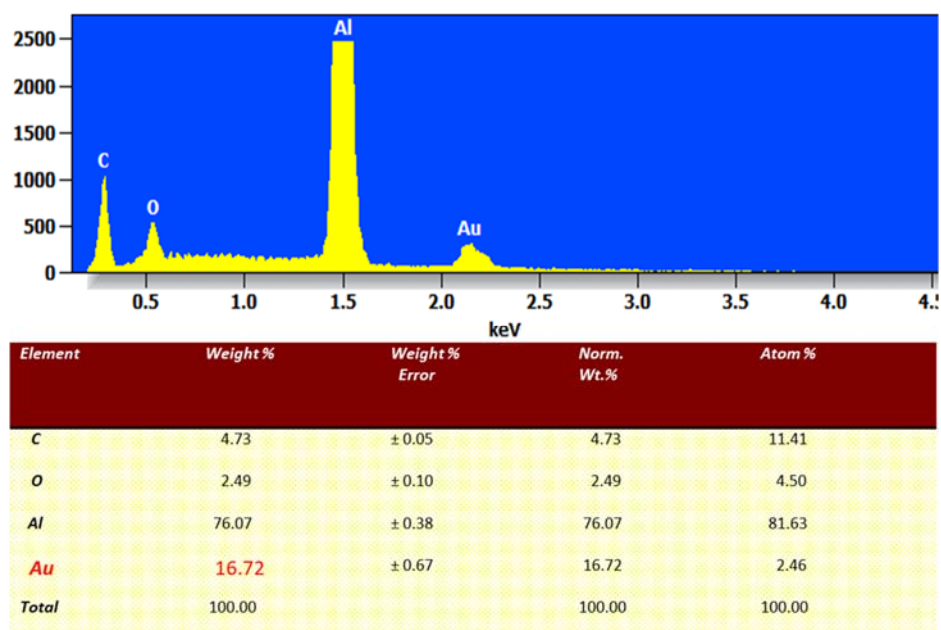

**Figure S3.** EDS Spectrum and quantitative analysis of the concave-like structured Al templates with Au sputtering for 108 s and subsequent thermal annealing 400 °C for 30 min.

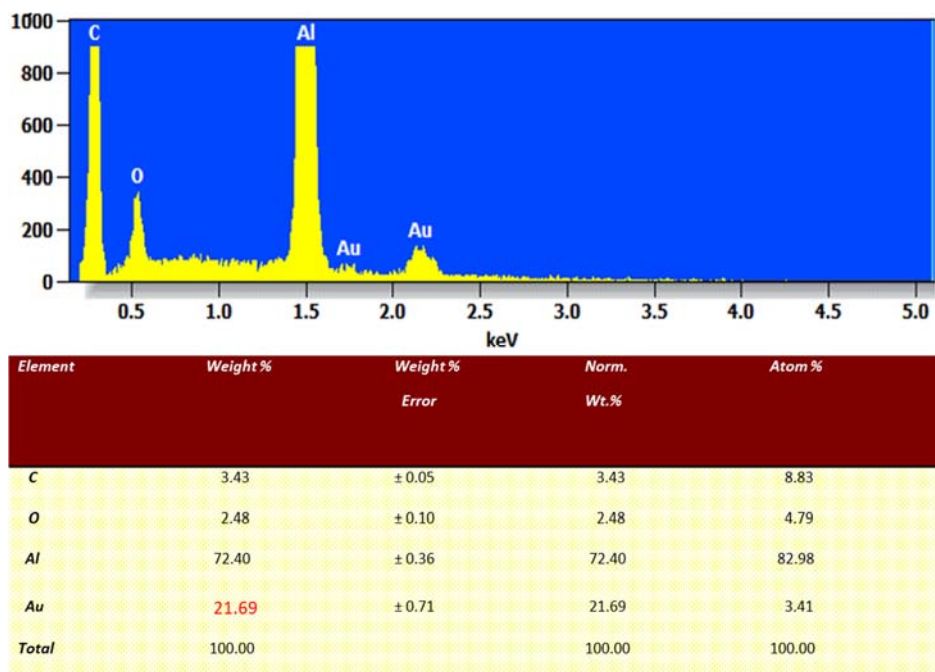

**Figure S4.** EDS Spectrum and quantitative analysis of the concave-like structured Al templates with Au sputtering for 200 s and subsequent thermal annealing 400 °C for 30 min.

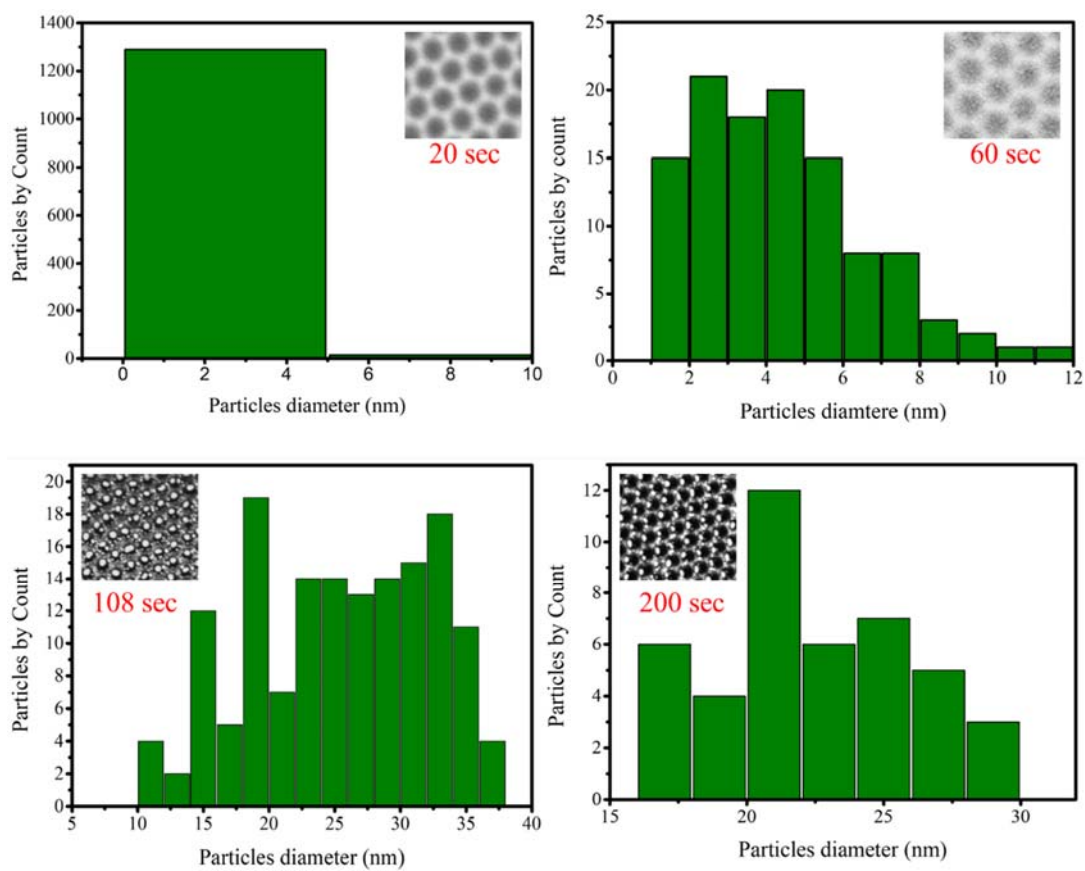

**Figure S5.** Au particle size distribution histogram for various Au sputtering times after thermal annealing of 400°C during 30 min.

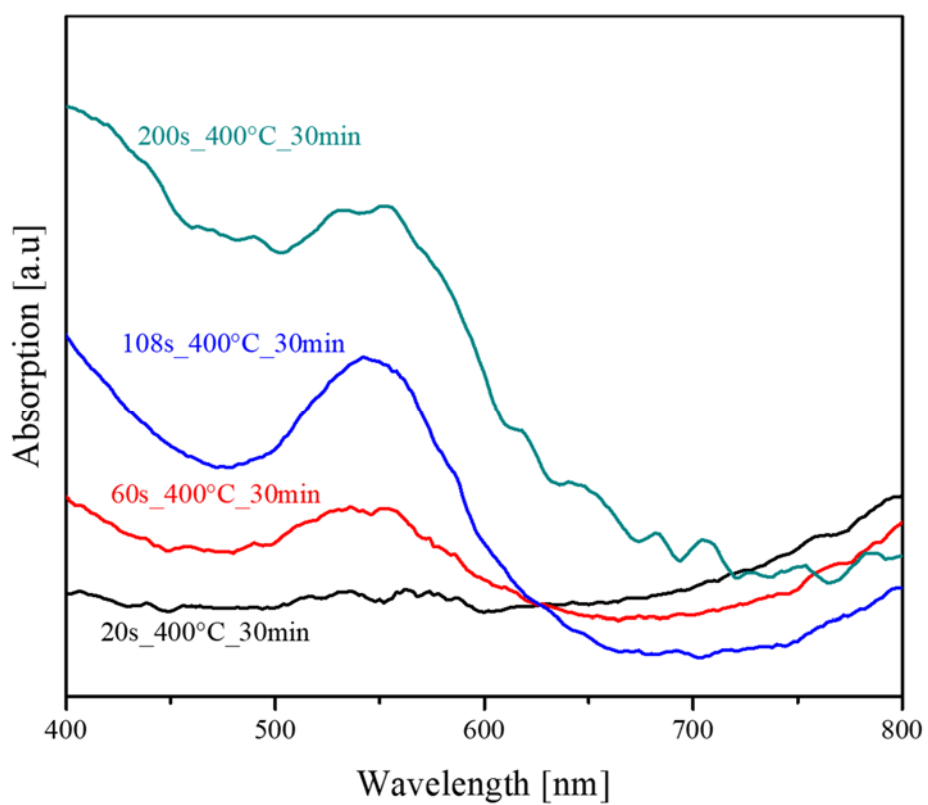

**Figure S6.** UV-vis absorption spectra of prepared Al-nanoconcavities substrates with 20, 60, 108 and 200 s Au pattering thermally treated at 400 °C for 30 min.

## 2. SERS Measurements

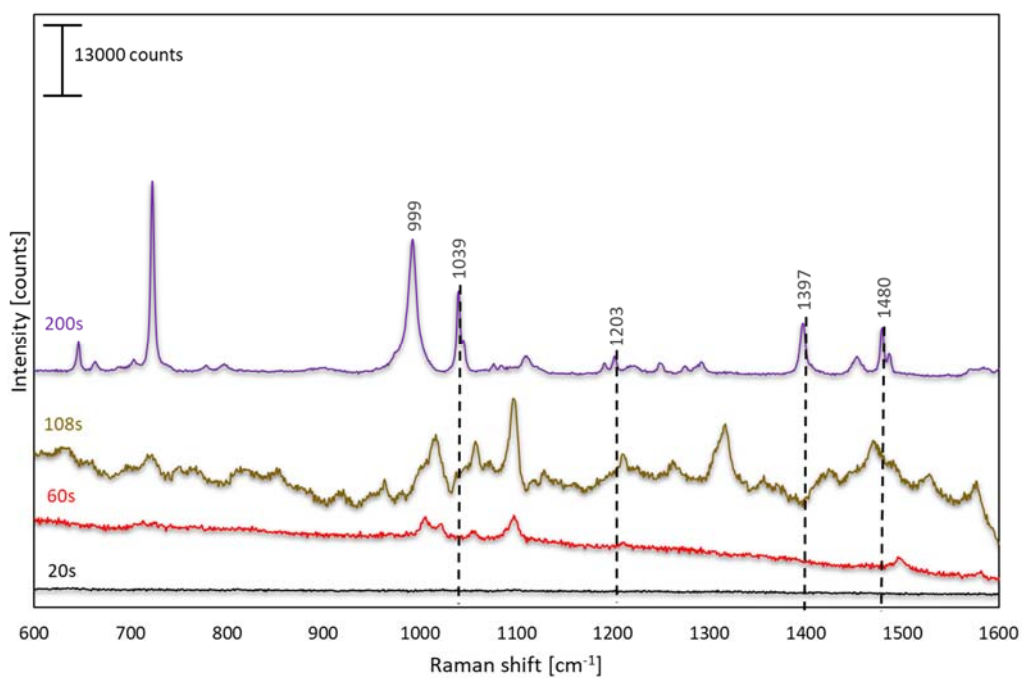

**Figure S7.** SERS spectra of 20, 60, 108, and 200 s Au sputtered substrates for 350°C during 30 min thermal annealing. The concentration of 4-Mpy was  $10^{-7}$  M for all.

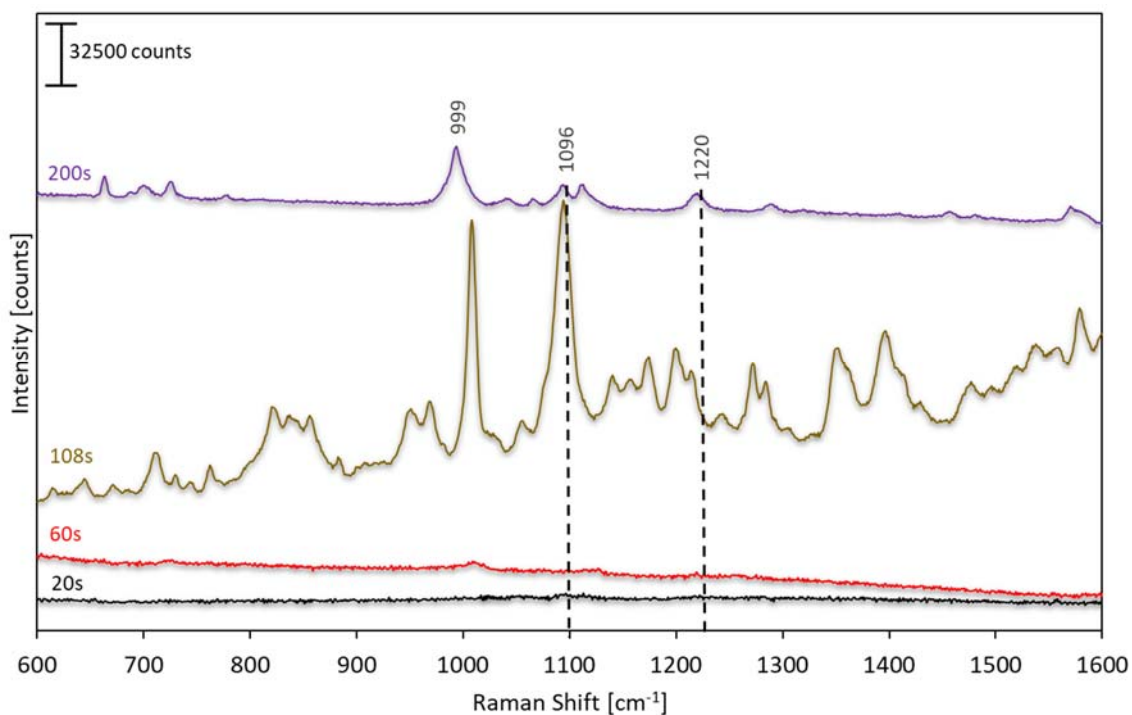

**Figure S8.** SERS spectra of 20, 60, 108, and 200 s Au sputtered substrates for 400°C during 30 min thermal annealing. The concentration of 4-Mpy was  $10^{-7}$  M for all.

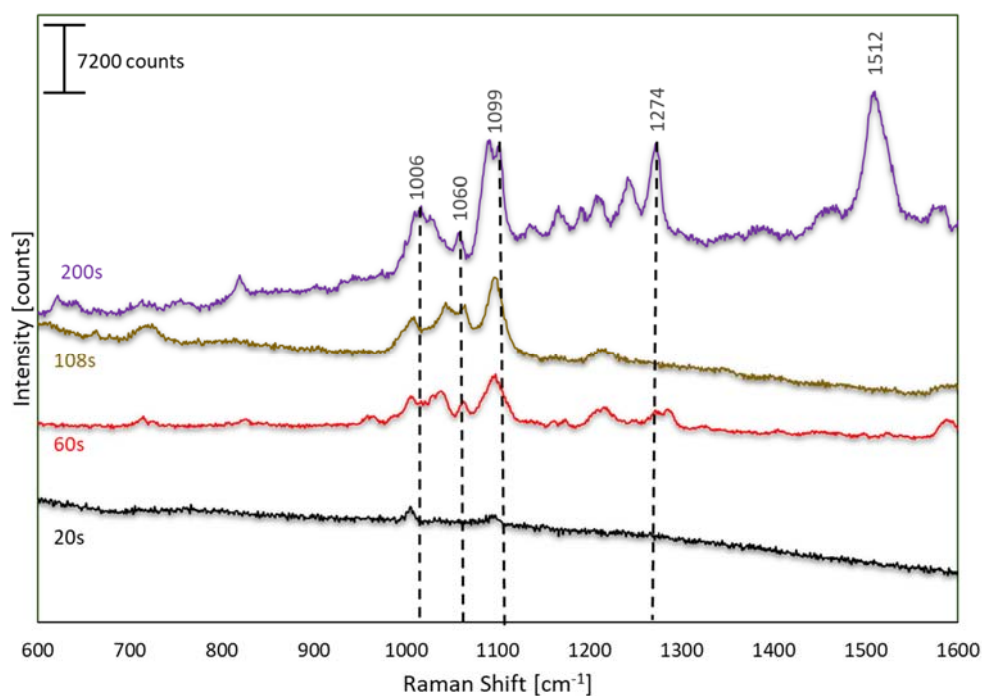

**Figure S9.** SERS spectra of 20, 60, 108, and 200 s Au sputtered substrates for 400°C during 120 min thermal annealing. The concentration of 4-Mpy was  $10^{-7}$  M for all.

This analysis was conducted using the Raman shift value of  $1097\text{ cm}^{-1}$ . The curve serves to identify the region suitable for quantification purposes. The red line denotes the region of insufficient concentration, rendering quantification unattainable.

### 3. Calculation of Enhancement factor

A typical method to objectively determine SERS proficiency is the calculation of the enhancement factor (EF). We have followed the most standard and accurate method [1] for its determination, expressed in Equation 1

$$EF = (I_{\text{surf}} / N_{\text{surf}}) (I_{\text{bulk}} / N_{\text{bulk}}) \quad (1)$$

where the intensities of the vibrational modes in the SERS and Raman spectra are denoted as  $I_{\text{surf}}$  and  $I_{\text{bulk}}$ , respectively,  $N_{\text{bulk}}$  is the total number of molecules subjected to Raman spectrum analysis, and the number of molecules subjected to SERS probes is denoted by  $N_{\text{surf}}$ . The expression for the calculation of  $N_{\text{bulk}}$  used is  $N_{\text{bulk}} = A \cdot h \cdot \rho \cdot N_{\text{a}} / M$  [2], where  $A$  is the area of laser spot,  $h$  is the penetration depth,  $\rho$  is the density of probe molecule,  $N_{\text{a}}$  is the Avogadro's number. And  $M$  is the molecular weight. Based on the numerical aperture of the long working distance objective ( $NA = 0.5$ ), we calculated the expected depth of penetration, of  $6.28\text{ }\mu\text{m}$ . The area of the laser spot is  $2.84\text{ }\mu\text{m}^2$

(radius of 0.95  $\mu\text{m}$ ). Based on these values, we calculate the total number of molecules in the bulk sample, that is  $N_{\text{Bulk}} 1.1 \times 10^{11}$  molecules.

Many factors are considered when estimating the number of molecules that contribute to the SERS signal on the Al substrate ( $N_{\text{Surf}}$ ). The first is that the amplification is caused only by the Au fractals immediately next to the surface. The 4-MPy molecules are therefore adsorbing onto the Al surface in a flat, parallel orientation, which leads to the second observation. The SERS spectra provide strong evidence for this, namely the presence of non-symmetric modes ( $b_2$ ). Recent DFT calculations further support this assumption [3, 4]. The number of molecules on the surface of the laser ( $N_{\text{Surf}}$ ) is  **$9.1 \times 10^4$  molecules** and is calculated briefly in SI. At the Raman shift of  $1097 \text{ cm}^{-1}$  for sample prepared for 108 s Au sputtering and thermally annealed at  $400 \text{ }^\circ\text{C}$  for 30 min, the enhancement factor was estimated as **EF  $1.6 \times 10^7$** . While evaluating the EF on various Raman shifts at  $1009 \text{ cm}^{-1}$ , **EF=  $3.4 \times 10^7$**  was determined.

## References

1. He, S., et al., *Optimizing the SERS enhancement of a facile gold nanostar immobilized paper-based SERS substrate*. RSC advances, 2017. **7**(27): p. 16264-16272.
2. Muehlethaler, C., et al., *Ultrahigh Raman enhancement on monolayer MoS<sub>2</sub>*. ACS Photonics, 2016. **3**(7): p. 1164-1169.
3. Gardner, A.M. and T.G. Wright, *Consistent assignment of the vibrations of monosubstituted benzenes*. The Journal of chemical physics, 2011. **135**(11).
4. Birke, R.L. and J.R. Lombardi, *Simulation of SERS by a DFT study: a comparison of static and near-resonance Raman for 4-mercaptopyridine on small Ag clusters*. Journal of Optics, 2015. **17**(11): p. 114004.
